# Supplementary material for: Pathways for Understanding Blue Carbon Microbiomes with Amplicon Sequencing
Source: MDPI journal article supplement (doi:10.3390/microorganisms10112121), 2022-10-26
Supplement: s1 [file s1]

**File S4. Suggested reference values for data collection.** Factors relevant to the standard collection of sediment samples for amplicon sequencing approaches and subsequent meta-analysis, with corresponding values. Data formats, measurement units, and proposed values are provided each parameter listed in the “data recording worksheet for soil samples” – Appendix G in the Blue Carbon Manual [30].

## Appendix G – Data recording worksheet for soil samples

### 1. Field work

#### Person/Institution (and contact information)

*{text} = any*

#### Date

*{dd-mm-yyyy} = any*

#### Hour and tide information

*{hh-mm-ss} = any*

*{text} = any*

#### Core ID

*{text/value} = any*

#### General location (area, country)

*{text, text} = any*

#### GPS position

*{ddd° mm' ss.s"} = any*

#### Depth of water column (if applicable)

*{value} = any*

#### Coring device material

*{text} = any*

#### Internal diameter of the core (cm)

*{value} = at least x*

#### Total length of the corer (cm)

*{value} = a-b (seagrass), c-d (mangroves), e-f (salt marshes)*

#### Coring system

*{text} = any*

#### Corer-end (cutting head/syringe)

*{text} = cutting head/syringe*

#### Coring vertically (Y/N)?

*{text} = Y*

#### Total length of corer outside sediment after core insertion (cm)

*{value} = less than x*

**Total length of soil core (cm) – paired-design \***

*{value} = g-h (seagrass), i-j (mangroves), k-l (salt marshes)*

**Sliced in X cm-slices (whole core or hemi-core?) – paired-design \***

*{value} = m, whole/hemi (seagrass); n, whole/hemi (mangroves); o, whole/hemi (salt marshes)*

**Total number of samples – paired-design \***

*{value} = at least 3 per sample type*

**\* Paired-design:**

- Ideally, these parameters should match the depths of microbiome sampling.
- Alternatively, depth ranges should encompass the microbiome depths sampled.
- A minimum of 3 replicates (ideally >5) for a site-level characterisation.

**Notes/comments**

E.g., Coring issues? Sealing correct? Study site: Plant density/cover? Additional pictures of sampling site?  
Presence of shells, gravel, mud, plant debris, etc.

**Visual description of the core (high-resolution digital picture)**

- Bulk sediment samples should be collected as specified above.
- Rhizosphere samples (sediment detached from roots/rhizomes by shaking) should be collected at the same locations.
- Habitat-feature data and water physicochemical parameters (pH, salinity, electrical conductivity, temperature) should be recorded on-site.

**2. Lab – Create a sheet for each sample****Person/Institution**

*{text} = any*

**Date**

*{dd-mm-yyyy} = any*

**Core ID**

*{text/value} = any*

**Sample ID**

*{text/value} = any*

**Slice depth (cm) – paired-design \***

*{value} = a-b (seagrass), c-d (mangroves), e-f (salt marshes)*

**Slice thickness (cm) – paired-design \***

*{value} = g-h (seagrass), i-j (mangroves), k-l (salt marshes)*

**Dry bulk density (g/cm<sup>3</sup>)**

*{value} = any*

**Carbonate present (Y/N)?**

*{text} = any*

**Method used to determine inorganic carbon content**

*{text} = acidification methods/elemental analysis*

**Inorganic carbon content (%)**

*{value} = any*

**Organic carbon content (corrected for inorganic portion, g)**

*{value} = any*

**\* Paired-design:**

- Ideally, these parameters should match the depths of microbiome sampling.
- Alternatively, depth ranges should encompass the microbiome depths sampled.
- A minimum of 3 replicates (ideally >5) for a site-level characterisation.

**Notes/comments**

**E.g., Any deviations from standard operating protocols? Any machinery malfunctions?**

*Standard operating protocols from this manual should be used to determine carbon content.*

### **3. Lab – Create a sheet for each core**

**Person/Institution**

*{text} = any*

**Date**

*{dd-mm-yyyy} = any*

**Core ID**

*{text/value} = any*

**Corresponding sample IDs**

*{text/value} = any*

**Total carbon in core (MgC)**

*{value} = any*

### **FINAL CARBON ANALYSIS**

**Person/Institution**

*{text} = any*

**Date**

*{dd-mm-yyyy} = any*

**Location**

*{text} = any*

**Number of cores taken – paired-design \***

*{value} = at least x*

**Average carbon content of the cores (MgC)**

*{value} = any*

**Total area of strata (m<sup>2</sup>)**

*{value} = at least x*

**Total soil carbon (per top X cm) of the strata (MgC/ha, in top X meters of soil) – paired design \***

*{value} = any, in top x centimeters of soil*

**\* Paired-design:**

- Ideally, these parameters should match the depths of microbiome sampling.
- Alternatively, averages to represent site overall ( $\geq 3$  samples per site).
