# Supplementary material for: Pathways for Understanding Blue Carbon Microbiomes with Amplicon Sequencing
Source: MDPI journal article supplement (doi:10.3390/microorganisms10112121), 2022-10-26
Supplement: s1 [file s1]

**File S3. Suggested additional section for Blue Carbon associated metadata recording.** Modifications to the existing “data table” section in the metadata template from the Environmental Data Initiative (EDI) data portal are consistent with metadata recording suggestions in the Blue Carbon Manual [30].

**Source:** <https://environmentaldatainitiative.org/submit-your-data/>

## Blue carbon metadata table

*Attach this table to each raw metadata table submitted to the portal, indicating any associated graphical summaries (figures) or average values (tables).*

*Provide a “table name” and “table description”.*

*Each row in the below table describes one column in your data table.*

*Complete each row as follows:*

- **Column name:** This name must be exactly as it appears in the dataset. Please avoid special characters (like & or \), dashes and spaces. Underscores are permissible. Do not begin a column name with a number.
- **Description:** Please give a specific definition of the column name. This can be lengthy.
- **Unit:** Identify units for all numeric variables. Please avoid special characters and describe units in this pattern: e.g. microSiemenPerCentimeter, microgramsPerLiter, absorptionPerMolePerCentimeter.
- **Code explanation:** If you use codes in your column, please explain in this way: e.g., LR=Little Rock Lake, A=Sample suspect, J=Nonstandard routine followed.
- **Date format:** Please tell us exactly how the date and time is formatted: e.g. dd/mm/yyyy hh:mm:ss plus the time zone and whether or not daylight savings was observed. ISO date format of YYYY-MM-DD or YYYY-MM-DD hh:mm:ss is preferred.
- **Missing value code:** If a code for ‘no data’ is used, please specify: e.g., -99999.

**Table name:** Blue Carbon associated metadata

**Table description:** water physicochemical parameters and carbon mass levels associated with rhizobiome samples that were also analysed through amplicon sequencing approaches.

**Associated graphical summaries (figures):** Figure x, y, and z in {reference}.

**Associated average values (tables):** Table a, b, and c in {reference}.

| Column name              | Description                                                                                                | Unit /<br>explanation /<br>format | Code<br>Date | Missing value code           |
|--------------------------|------------------------------------------------------------------------------------------------------------|-----------------------------------|--------------|------------------------------|
| Water temperature        | Temperature of the water column                                                                            | degreeCelsius /                   | nm           | Blank /<br>nm = not measured |
| Water pH                 | pH of the water column                                                                                     | None /                            | nm           | Blank /<br>nm = not measured |
| Water salinity           | Salinity of the water column                                                                               | practicalSalinityUnit /           | nd           | Blank /<br>nd = not detected |
| Water conductivity       | Conductivity of the water column                                                                           | microSiemenPerCentimeter /        | nd           | Blank /<br>nd = not detected |
| Dry bulk density         | Sediment mass (weight) of the dry solids divided by the total volume of the wet sample                     | gramPerCubicCentimetre /          | nm           | Blank /<br>nm = not measured |
| Inorganic carbon content | Inorganic carbon portion of the sediment sample, determined by acidification methods or elemental analysis | %                                 |              | Blank /<br>nm = not measured |
| Organic carbon content   | Organic matter stock of the sediment sample, corrected for inorganic portion                               | %                                 |              | Blank /<br>nm = not measured |
